# Supplementary material for: Dynamic expression of Ralstonia solanacearum virulence factors and metabolism-controlling genes during plant infection
Source: PubMed Central journal article supplement (PMC7941725; doi:10.1186/s12864-021-07457-w), 2021-03-09

**A**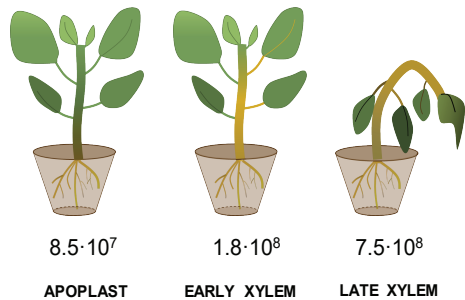**Reference**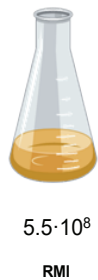**B**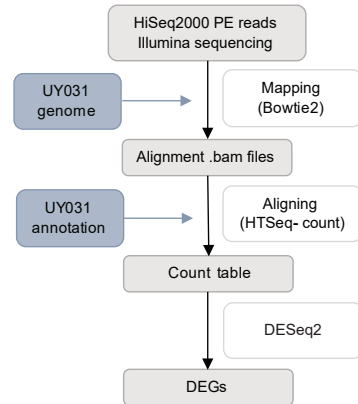**C**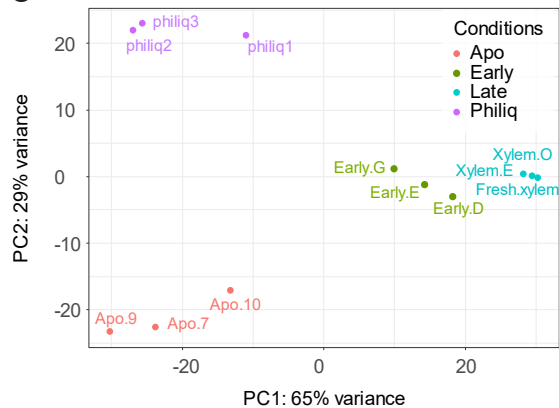**Vacuum inoculation**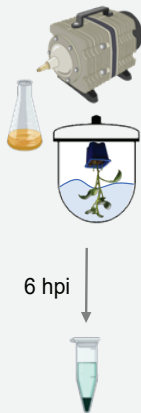**Drench inoculation**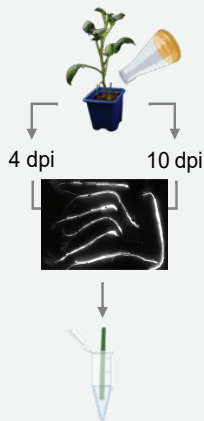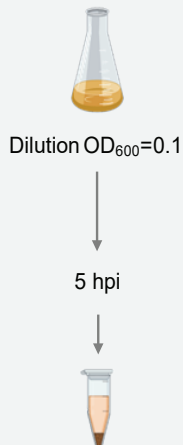

Supplement: 12864_2021_7457_MOESM2_ESM.pdf [file 12864_2021_7457_MOESM2_ESM.pdf]
