# Supplementary material for: Dynamic expression of Ralstonia solanacearum virulence factors and metabolism-controlling genes during plant infection
Source: PubMed Central journal article supplement (PMC7941725; doi:10.1186/s12864-021-07457-w), 2021-03-09

**A**

| Induced - UP        |                      |                      | Repressed - DOWN    |                     |                      | Ref                                         |
|---------------------|----------------------|----------------------|---------------------|---------------------|----------------------|---------------------------------------------|
| Apoplast            | Early Xylem          | Late Xylem           | Apoplast            | Early Xylem         | Late Xylem           |                                             |
| <b>18%</b> (40/226) | <b>9%</b> (27/290)   | <b>5%</b> (20/378)   | <b>0%</b> (0)       | <b>1%</b> (3/241)   | <b>5%</b> (26/544)   | <b>RNaseq UY031 - Potato root UP</b> (36)   |
| <b>0%</b> (0)       | <b>0%</b> (1/290)    | <b>0%</b> (1/378)    | <b>17%</b> (32/192) | <b>9%</b> (21/241)  | <b>5%</b> (26/544)   | <b>RNaseq UY031 - Potato root DOWN</b> (36) |
| <b>33%</b> (74/226) | <b>34%</b> (100/290) | <b>27%</b> (102/378) | <b>6%</b> (11/192)  | <b>3%</b> (8/241)   | <b>2%</b> (12/544)   | <b>μarray UW551 - Tomato UP</b> (14)        |
| <b>1%</b> (2/226)   | <b>1%</b> (4/290)    | <b>1%</b> (4/378)    | <b>32%</b> (61/192) | <b>36%</b> (86/241) | <b>26%</b> (142/544) | <b>μarray UW551 - Tomato DOWN</b> (14)      |
| <b>13%</b> (30/226) | <b>20%</b> (58/290)  | <b>15%</b> (56/378)  | <b>5%</b> (9/192)   | <b>3%</b> (8/241)   | <b>2%</b> (9/544)    | <b>μarray GMI1000 - Tomato UP</b> (14)      |
| <b>1%</b> (2/226)   | <b>1%</b> (2/290)    | <b>1%</b> (2/378)    | <b>16%</b> (31/226) | <b>21%</b> (50/241) | <b>16%</b> (86/544)  | <b>μarray GMI1000 - Tomato DOWN</b> (14)    |
| <b>8%</b> (17/226)  | <b>9%</b> (27/290)   | <b>7%</b> (27/378)   | <b>6%</b> (12/226)  | <b>5%</b> (11/241)  | <b>3%</b> (16/544)   | <b>RNaseq GMI1000 - Tomato UP</b> (42)      |
| <b>5%</b> (12/226)  | <b>5%</b> (14/290)   | <b>4%</b> (15/378)   | <b>15%</b> (29/226) | <b>8%</b> (19/241)  | <b>12%</b> (63/544)  | <b>RNaseq GMI1000 - Tomato DOWN</b> (42)    |

**B**

Root-Apoplast correlation

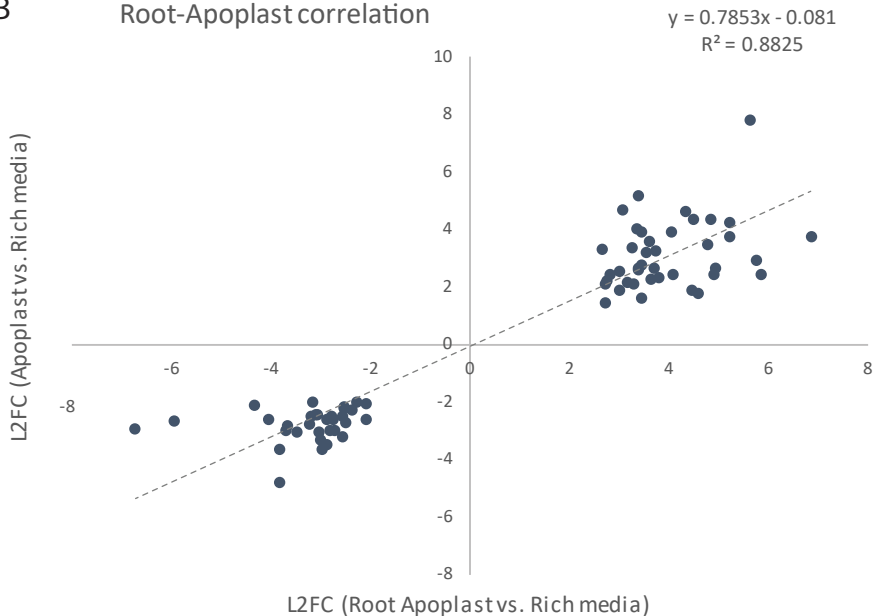

Supplement: 12864_2021_7457_MOESM4_ESM.pdf [file 12864_2021_7457_MOESM4_ESM.pdf]
