# Supplementary material for: Dynamic expression of Ralstonia solanacearum virulence factors and metabolism-controlling genes during plant infection
Source: PubMed Central journal article supplement (PMC7941725; doi:10.1186/s12864-021-07457-w), 2021-03-09
Supplement: 12864_2021_7457_MOESM9_ESM.pdf [file 12864_2021_7457_MOESM9_ESM.pdf]

# Transcripts per million

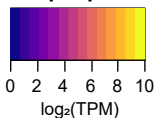

Rich B medium

Apoplast

Early xylem

Late xylem

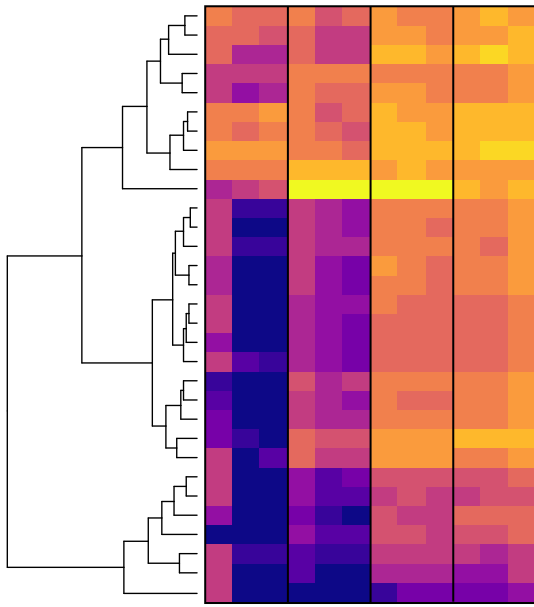

RSUY\_RS08235 / hrpA  
RSUY\_RS19840 / prhA  
RSUY\_RS03980 / hutC  
RSUY\_RS19665 / prhJ  
RSUY\_RS19670 / hrpG  
RSUY\_RS20365 / prhG  
RSUY\_RS03975 / hrcA  
RSUY\_RS09960 / prhN  
RSUY\_RS19655 / prhI  
RSUY\_RS19685 / hrpY  
RSUY\_RS19735 / hrpK  
RSUY\_RS19780 / hrcC  
RSUY\_RS19775 / hrpB  
RSUY\_RS19730 / hrcU  
RSUY\_RS19725 / hrcV  
RSUY\_RS19745 / hrcJ  
RSUY\_RS19700 / hrpV  
RSUY\_RS19740 / hrpJ  
RSUY\_RS19760 / hrcH  
RSUY\_RS19675 / hpaB  
RSUY\_RS19770 / hrcT  
RSUY\_RS19710 / hrcR  
RSUY\_RS19680 / hrpZ  
RSUY\_RS19690 / hrpX  
RSUY\_RS19715 / hrcQ  
RSUY\_RS19695 / hrpW  
RSUY\_RS19720 / hpaP  
RSUY\_RS19705 / hrcS  
RSUY\_RS19755 / hrpF  
RSUY\_RS19765 / hrpD  
RSUY\_RS19750 / hrpH
