# Supplementary material for: Dynamic expression of Ralstonia solanacearum virulence factors and metabolism-controlling genes during plant infection
Source: PubMed Central journal article supplement (PMC7941725; doi:10.1186/s12864-021-07457-w), 2021-03-09
Supplement: 12864_2021_7457_MOESM12_ESM.pdf [file 12864_2021_7457_MOESM12_ESM.pdf]

Transcripts per million

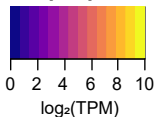

Rich B medium

Apoplast

Early xylem

Late xylem

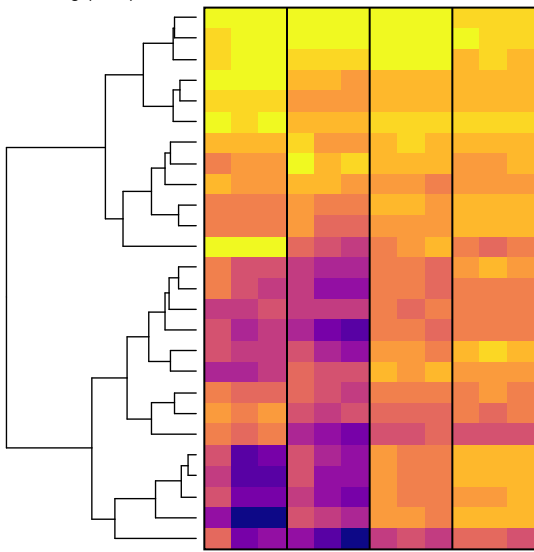

RSUY\_RS12705 / sodB  
RSUY\_RS17495 / ahpC1  
RSUY\_RS04770 / -  
RSUY\_RS03345 / tpx  
RSUY\_RS02350 / -  
RSUY\_RS02640 / petA  
RSUY\_RS04870 / katGb  
RSUY\_RS22220 / katE  
RSUY\_RS02710 / cyoC1  
RSUY\_RS03780 / oxyR  
RSUY\_RS17500 / ahpF  
RSUY\_RS12010 / sodC  
RSUY\_RS01540 / -  
RSUY\_RS02825 / -  
RSUY\_RS06465 / -  
RSUY\_RS04855 / -  
RSUY\_RS06600 / -  
RSUY\_RS10090 / ahpC2  
RSUY\_RS03005 / -  
RSUY\_RS21015 / ohr  
RSUY\_RS04845 / -  
RSUY\_RS10095 / ahpD  
RSUY\_RS05325 / -  
RSUY\_RS05320 / -  
RSUY\_RS03740 / -  
RSUY\_RS00075 / gor
